# Supplementary material for: Hereditary hemorrhagic telangiectasia may be the most morbid inherited bleeding disorder in women
Source: PubMed Central journal article supplement — Blood Adv. 2024 Apr 10;8(12):3166–72. doi: 10.1182/bloodadvances.2023011961 (PMC11225659; doi:10.1182/bloodadvances.2023011961), 2024-04-10
Supplement: BLOODA_ADV-2023-011961-mmc1.pdf [file BLOODA_ADV-2023-011961-mmc1.pdf]

**HEREDITARY HEMORRHAGIC TELANGIECTASIA MAY BE THE MOST MORBID INHERITED BLEEDING  
DISORDER OF WOMEN**

**SUPPLEMENTARY APPENDIX**

## **SUPPLEMENTAL METHODS**

### *HHT Query Parameters*

- 1) ICD-9/ICD-10 codes for hereditary hemorrhagic telangiectasia OR search through notes function for “hereditary hemorrhagic telangiectasia.” Requirement for ICD code or appearance of “hereditary hemorrhagic telangiectasia” in notes to appear at least in 3 independent encounters. No date restriction.
- 2) Female legal gender OR female gender identity OR transgender female (male-to-female) gender identity. No date restriction.

### *VWD Query Parameters*

- 1) ICD-9/ICD-10 codes for von Willebrand disease OR search through notes function for “von Willebrand disease.” Requirement for ICD code or appearance of “von Willebrand disease” in notes to appear at least in 3 independent encounters. No date restriction.
- 2) Female legal gender OR female gender identity OR transgender female (male-to-female) gender identity. No date restriction.
